# Supplementary figures and images for: The Early Endocytosis Gene PAL1 Contributes to Stress Tolerance and Hyphal Formation in Candida albicans
Source: MDPI journal article supplement (doi:10.3390/jof9111097), 2023-11-10

Figure S1

A

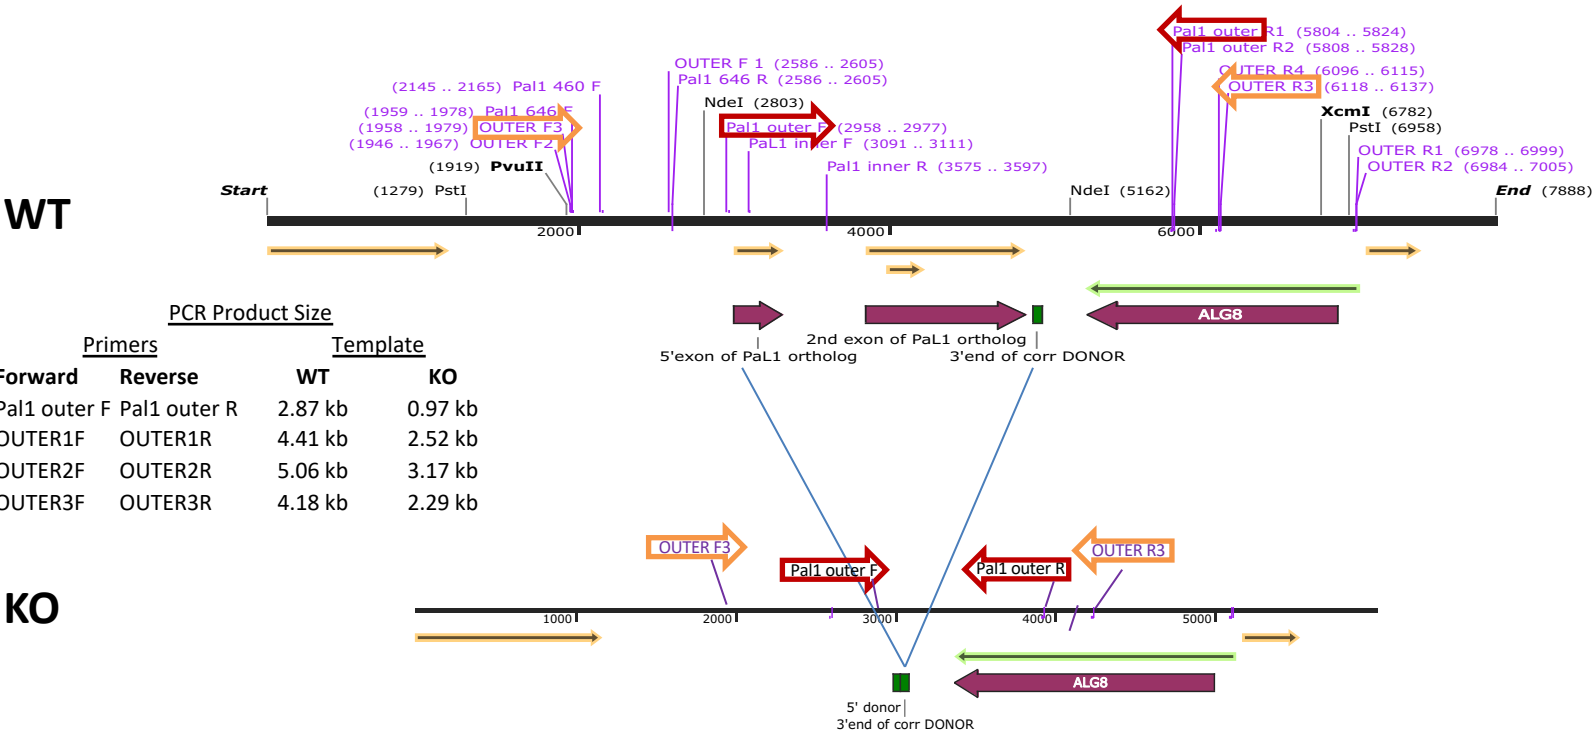

B

## Outer PCR

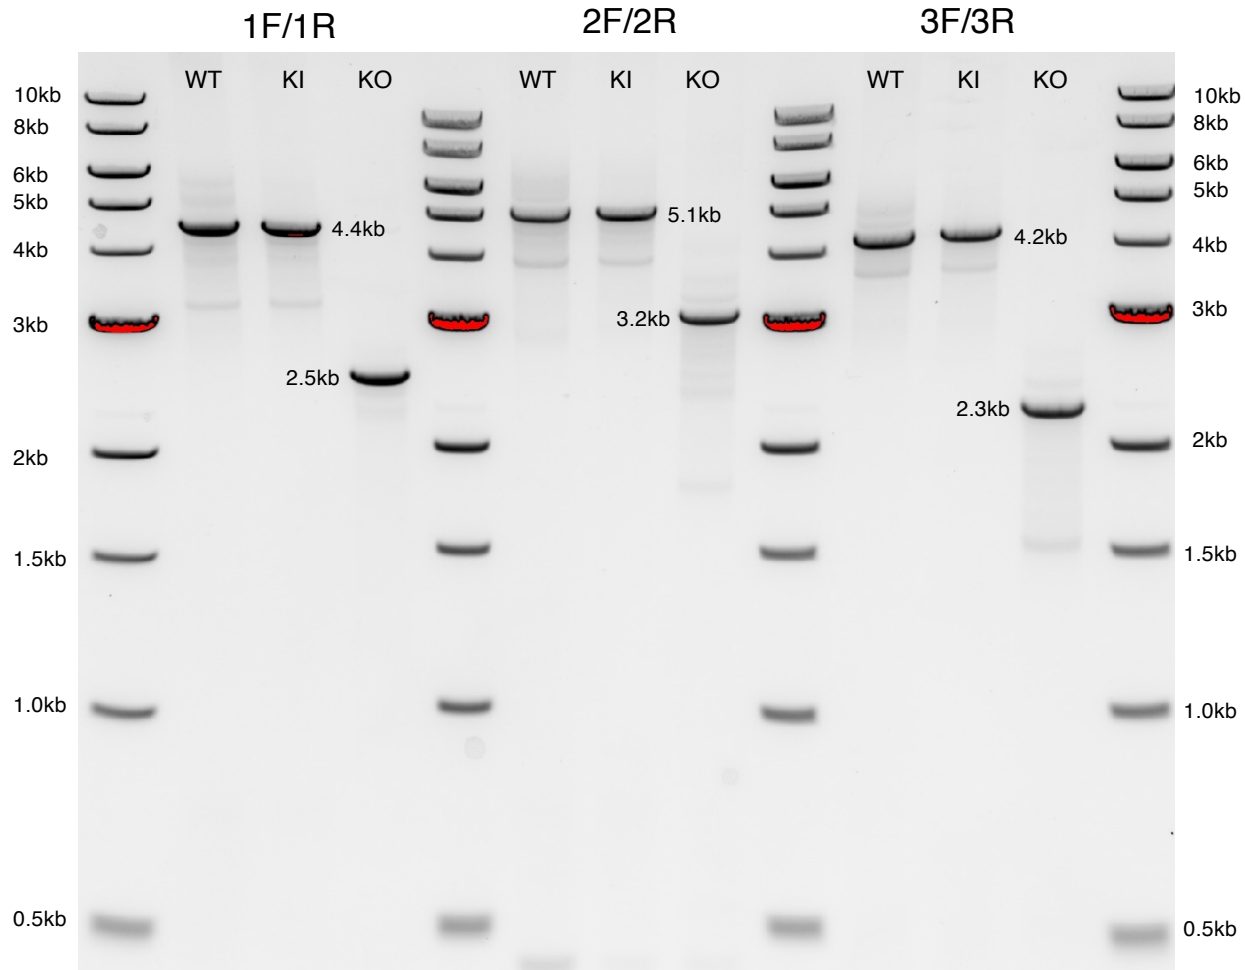

C

Inner PCR

wt    KI    KO

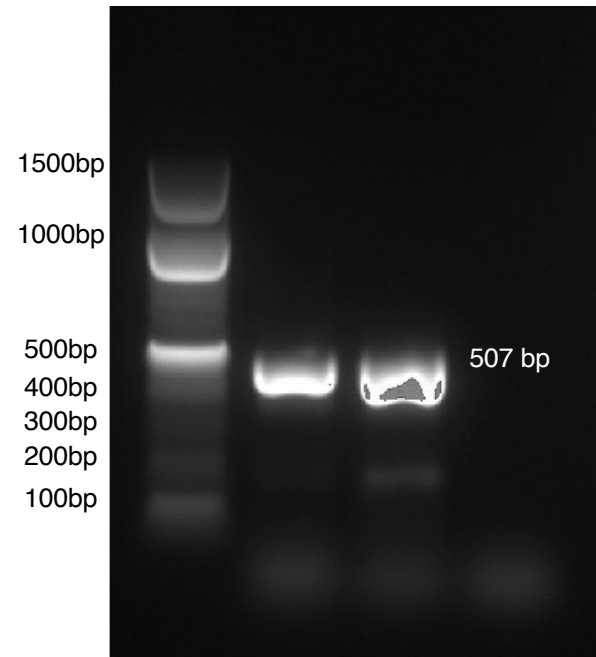

Figure S2

DIC

WT

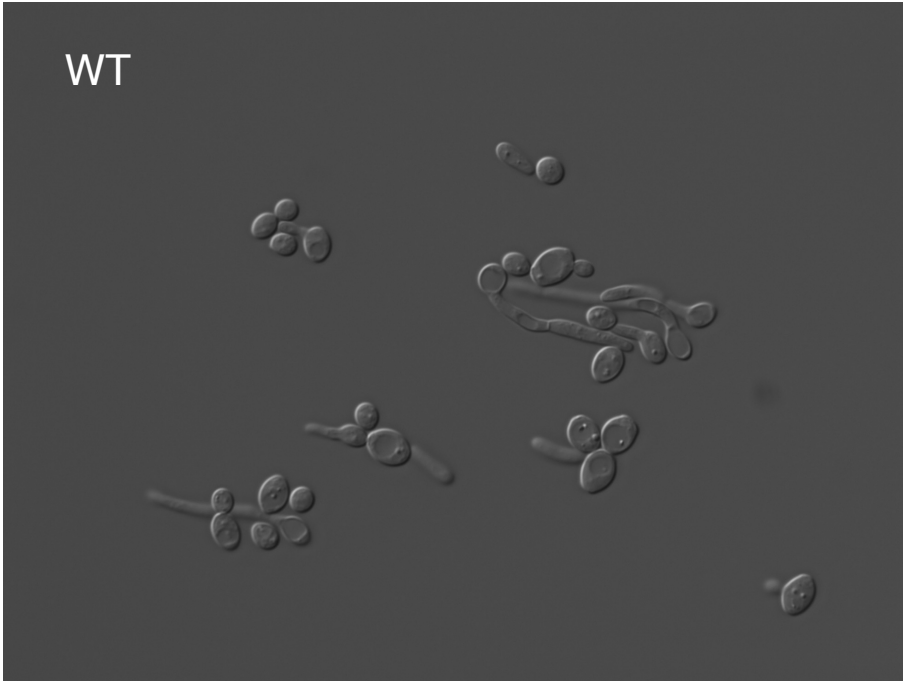

CW

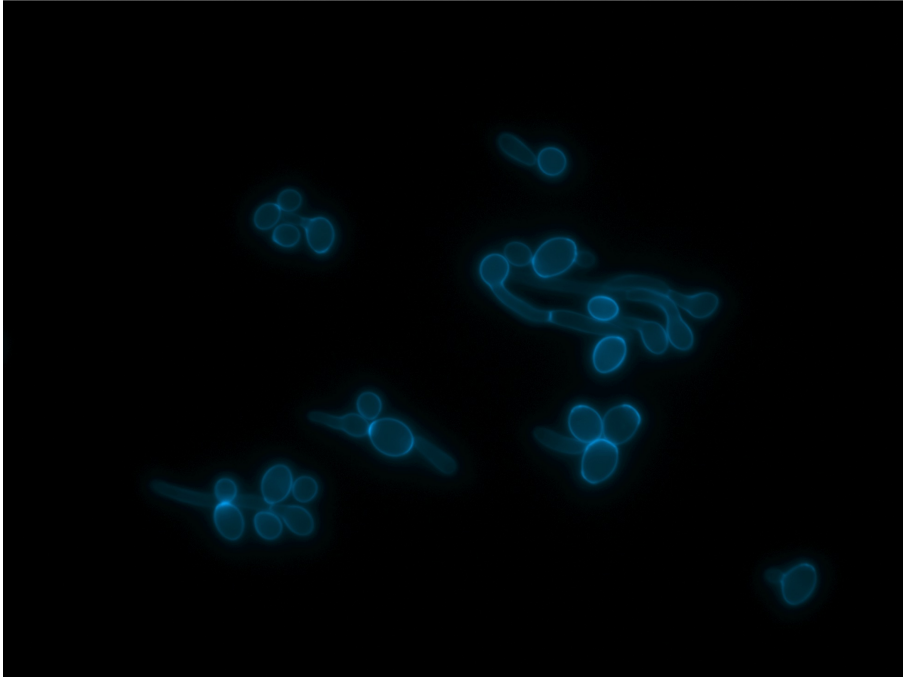

KI

DIC

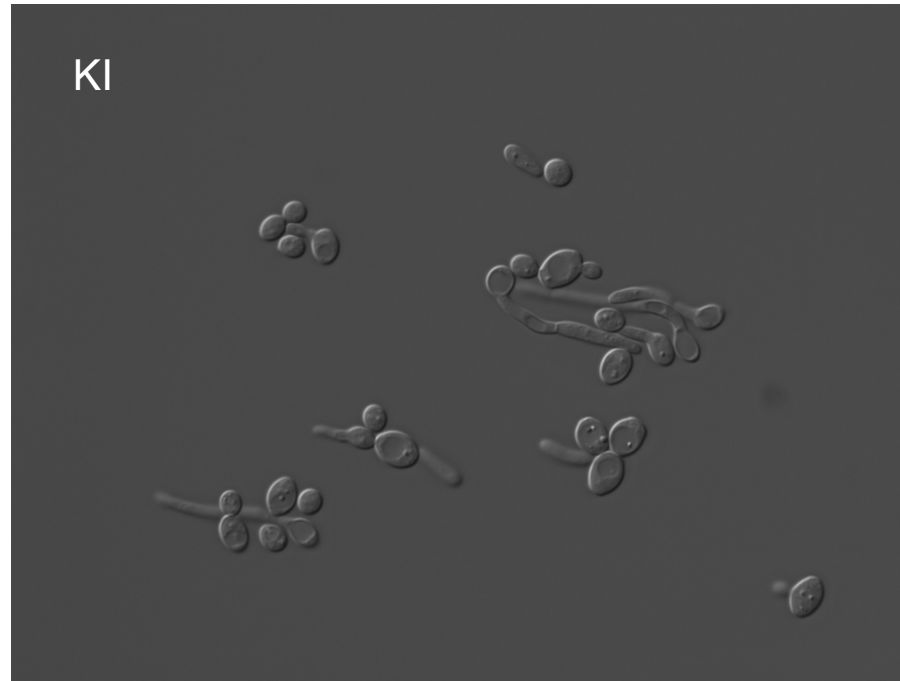

CW

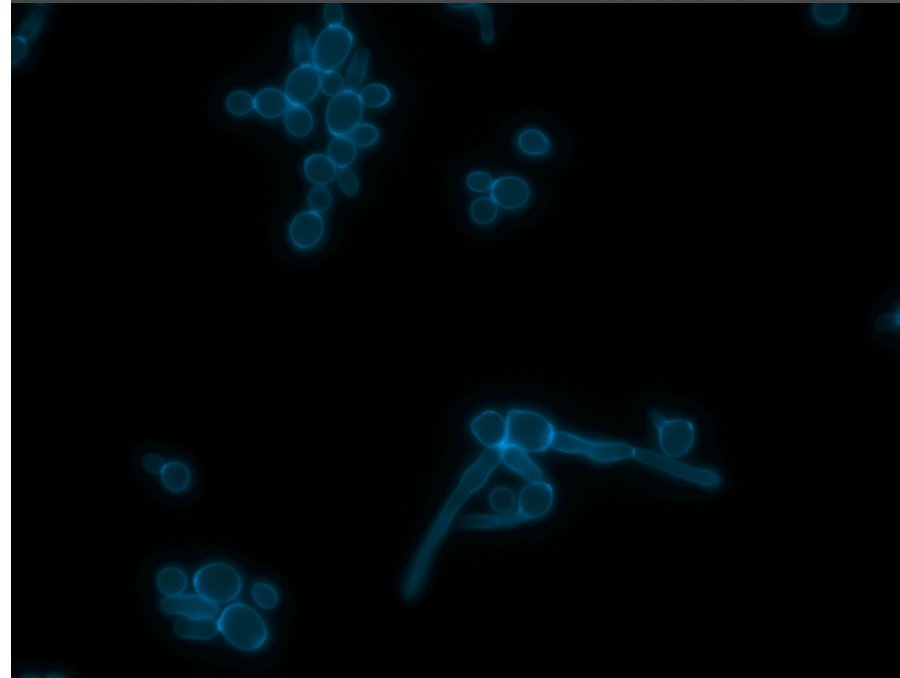

DIC

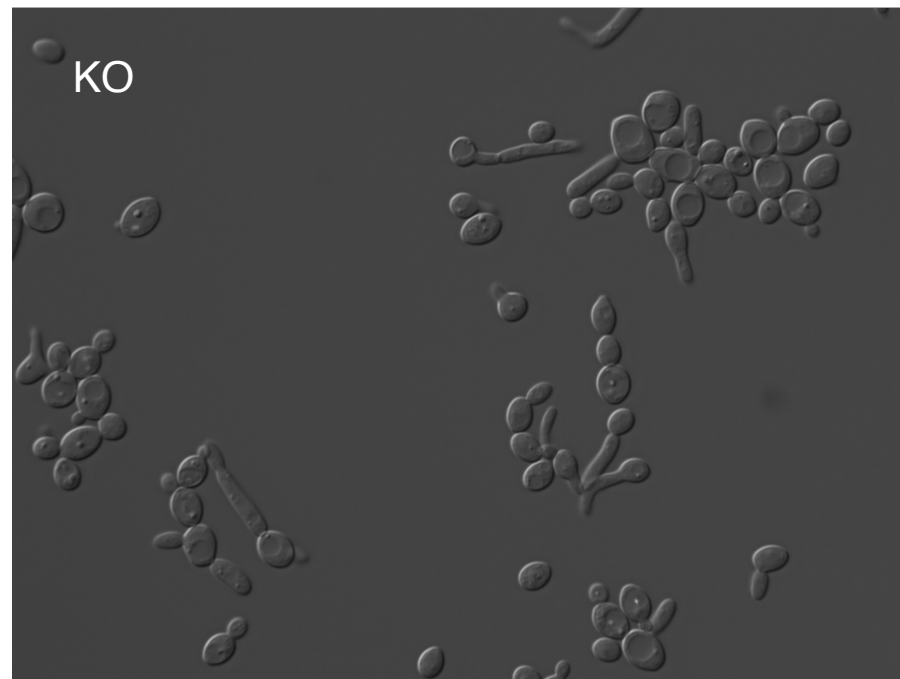

CW

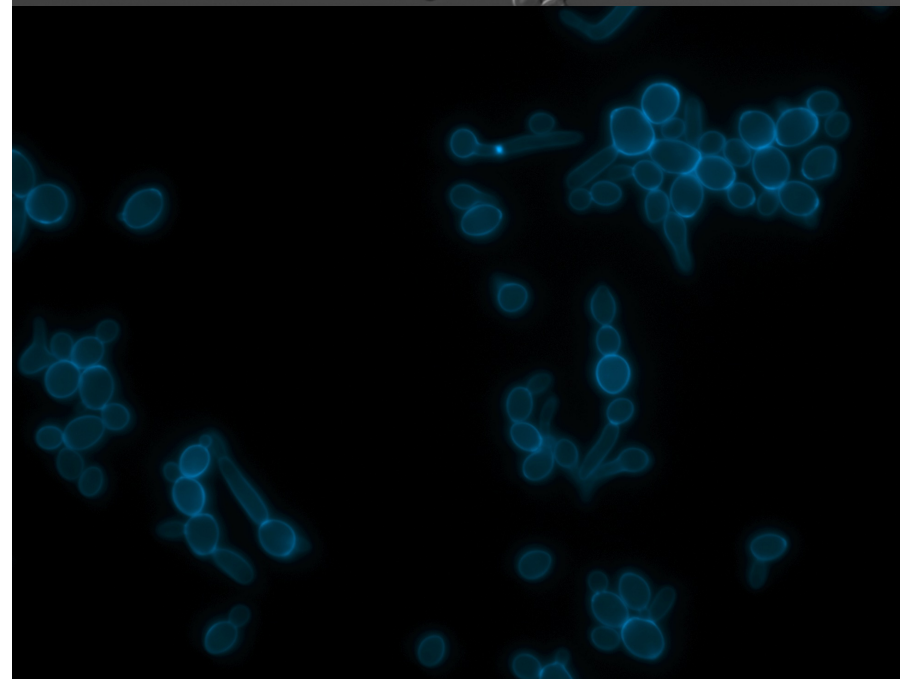

Supplement: s1 [file s1]
